# Supplementary material for: MIL-100(Fe)/silica gel: controllable preparation and photocatalytic activation of peroxydisulfate for tetracycline hydrochloride degradation
Source: Royal Society of Chemistry journal article supplement (doi:10.1039/d5nj01396h), 2025-01-01
Supplement: d5nj01396h1.pdf [file d5nj01396h1.pdf]

## Supplementary Information

# MIL-100(Fe)/silica gel: controllable preparation and photocatalytic activation of peroxydisulfate for tetracycline hydrochloride degradation

Yongxin Liu, Mengkun Xu, Jinge Lu, Xingchen Li, Jinxuan Gao, Jiali Zhang,

Shaoming Yang, and Xi Chen\*

### Corresponding Author

**Xi Chen** - School of Materials Science and Engineering, East China Jiaotong

University, Nanchang 330013, China; orcid.org/0000-0001-7655-3910; Email:

[chenxi731@foxmail.com](mailto:chenxi731@foxmail.com)

### Authors

**Yongxin Liu** - School of Materials Science and Engineering, East China Jiaotong

University, Nanchang 330013, China; orcid.org/0000-0002-3665-2209

**Mengkun Xu, Jinge Lu, Xingcheng Li, Jinxuan Gao, Jiali Zhang and Shaoming**

**Yang** - School of Materials Science and Engineering, East China Jiaotong University,

Nanchang 330013, China

## Materials and instrumentation

All reagents and solvents were analytical grade and used without any further purification. Ferric chloride ( $\text{FeCl}_3$ ) was purchased from Aladdin. Trimesic acid ( $\text{H}_3\text{BTC}$ ), Histidine (His), and tetracycline hydrochloride (TH) were purchased from Macklin. Ethanol (EtOH), methanol (MeOH), t-butanol (TBA), hydrochloric acid, N, N-dimethylformamide, ammonia and dimethyl silicone oil were purchased from Xilong Technology Co., Ltd. Tetraethoxysilane was purchased from Adamas. Triethanolamine (TEA) was purchased from Greagent. High purity nitrogen ( $\text{N}_2$ ) was purchased from Huayou Special Gas Co., Ltd. Powder X-ray diffraction patterns (XRD) of the products were obtained on a Bruker D8 Focus diffractometer equipped with  $\text{Cu K}\alpha$  radiation and a Lynx Eye detector. Field-emission scanning electron microscopy (SEM) images were observed on a Hitachi SU8010 scanning electron microscope. Thermogravimetric analyses (TGA) were performed with a Netzsch STA 449 F3 instrument under flowing air with a heating rate of  $10\text{ }^\circ\text{C min}^{-1}$ .  $\text{N}_2$  adsorption measurements were performed with a Micromeritics ASAP2020 instrument surface area analyzer at 77 K. The Brunauer-Emmett-Teller (BET) method was used to calculate the specific surface area. The concentration of TH was measured by UV-vis spectroscopy (UNICO UV-4802S).

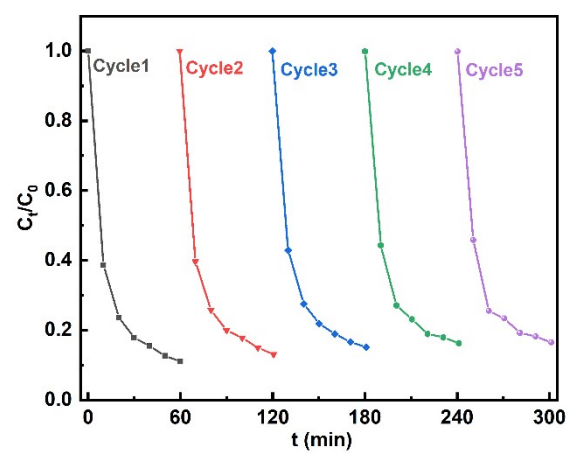

Fig. S1 The cycling performance of SM30.
